# Supplementary material for: Impact of pre-crosslinks on the self-transformation performance of thermoplastic polyesters into vitrimers via intermolecular transesterification
Source: Royal Society of Chemistry journal article supplement (doi:10.1039/d4ra08285k), 2025-01-01
Supplement: d4ra08285k1.pdf [file d4ra08285k1.pdf]

## Supporting Information

# Impact of pre-crosslinks on the self-transformation performance of thermoplastic polyesters into vitrimers via intermolecular transesterification

Yuhka Shimizu, Mikihiro Hayashi\*

Department of Life Science and Applied Chemistry, Graduate School of Engineering,  
Nagoya Institute of Technology, Gokiso-cho, Showa-ku Nagoya 466-8555, Japan

1. Feed ratio
2. Summary of gel fraction
3. SEC data
4.  $^1\text{H-NMR}$  of polyesters
5. Temperature-sweep rheology
6. Rheology data for P-30
7.  $^1\text{H-NMR}$  of starting monomers
8. Isothermal time-resolved rheology data at other temperatures
9. Plot of  $T_g$
10. TGA thermograms

## 1. Feed ratio

The actual feed mole ratio and feed weight ratio are summarized in Table S1.

Table S1. The feed mole ratio and feed weight ratio

|      |              | 2-SH | 2-epoxy | 4-epoxy |
|------|--------------|------|---------|---------|
| P-0  | mole ratio   | 100  | 100     | 0       |
|      | weight ratio | 10.0 | 14.3    | 0       |
| P-5  | mole ratio   | 100  | 90      | 5       |
|      | weight ratio | 10.0 | 12.9    | 0.9     |
| P-10 | mole ratio   | 100  | 80      | 10      |
|      | weight ratio | 10.0 | 11.4    | 1.8     |
| P-20 | mole ratio   | 100  | 60      | 20      |
|      | weight ratio | 10.0 | 8.6     | 3.5     |

## 2. Summary of gel fraction

Table S2. Summary of gel fraction for polymers

| Sample | Gel fraction |
|--------|--------------|
| P-0    | 0            |
| P-5    | 0            |
| P-10   | 0            |
| P-20   | 63           |
| P-30   | 76           |

Table S3. Summary of gel fraction for cross-linked polymer

| Sample | Gel fraction |
|--------|--------------|
| CL-0   | 96           |
| CL-5   | 97           |
| CL-10  | 98           |
| CL-20  | 100          |
| CL-30  | 100          |

\*) The values are for the samples after heating at 170 °C for 24h.

### 3. SEC data

The number average molecular weight ( $M_n$ ), weight average molecular weight ( $M_w$ ), and polydispersity index ( $D$ ) were determined using size exclusion chromatography (SEC). The set-up was composed of an LC20AD pump system and a RID-20A RI detector (SHIMADZU), where Shodex-gel columns, K-803, K-804, and K-805 (Shodex) were attached. The column temperature was 40 °C, and DMF containing LiBr (0.05 wt%) was used as an eluent at an elution rate of 1.0 mL/min. The standard series of poly(methyl methacrylate) was used for the estimation. SEC data for P-0, P-5, and P-10 are summarized in Figure S1. The values of  $M_n$ ,  $M_w$  and  $D$  are summarized in Table S4.

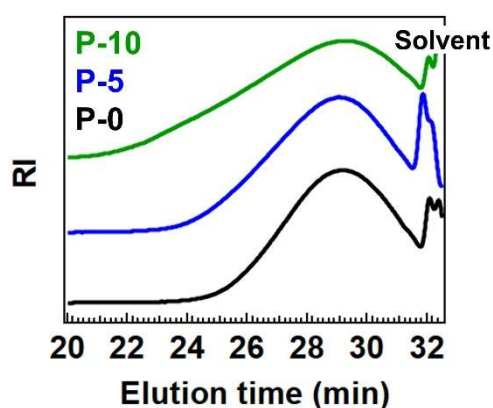

Figure S1. SEC spectra for P-0, P-5, and P-10.

Table S4. Characteristics of polyesters

| Sample | $M_n$ | $M_w$ | $D$ |
|--------|-------|-------|-----|
| P-0    | 6700  | 11000 | 1.7 |
| P-5    | 7900  | 14000 | 1.8 |
| P-10   | 8000  | 22000 | 2.7 |

#### 4. $^1\text{H-NMR}$ of polyesters

$^1\text{H-NMR}$  was measured for the polyesters. The measurement was performed in dimethyl sulfoxide- $d_6$  with a Bruker Analytik DPX400 spectrometer (400 MHz). Each signal with a different alphabet corresponds to the protons with the same alphabet in the chemical structures shown in the figure.

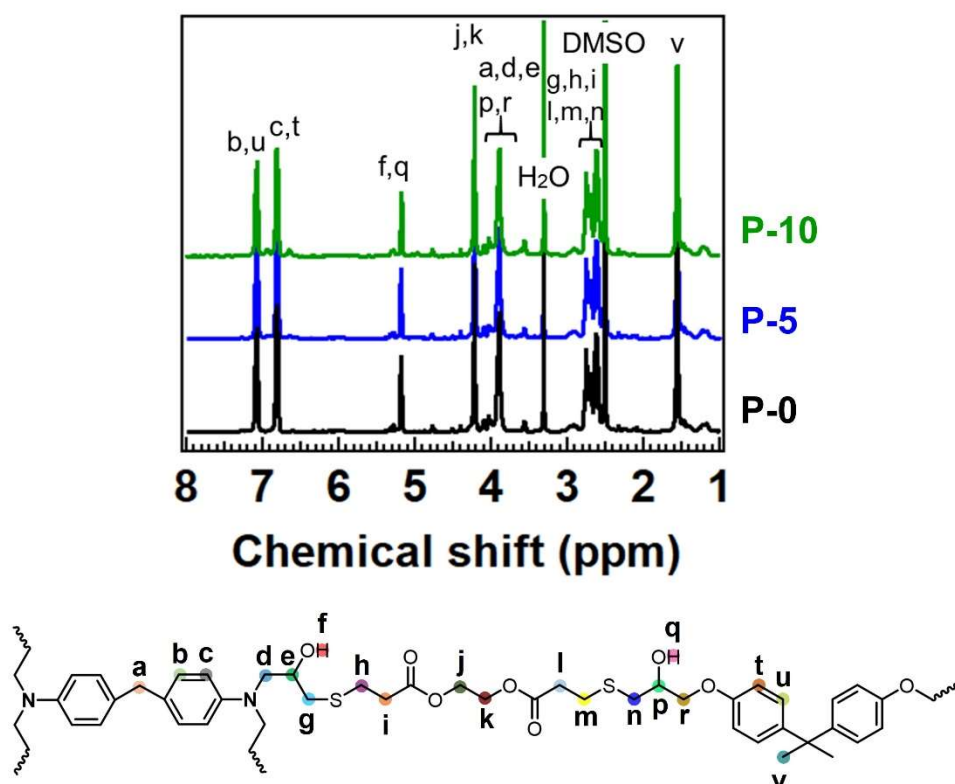

Figure S2.  $^1\text{H-NMR}$  for polyesters, P-0, P-5, and P-10. The signals in the spectra correspond to the protons with the same alphabet in the chemical structures.

Table S5. Integral ratio of characteristic signals in the  $^1\text{H-NMR}$  spectra

|      | a+d+e+p+r | b+u | c+t | f+q | g+h+i+l+m+n | j+k | v   |
|------|-----------|-----|-----|-----|-------------|-----|-----|
| P-0  | 5.7       | 4.5 | 4.5 | 1.8 | 11.5        | 4.0 | 7.4 |
| P-5  | 5.4       | 4.1 | 4.0 | 1.6 | 11.1        | 4.0 | 6.9 |
| P-10 | 5.3       | 3.8 | 3.9 | 1.5 | 11.4        | 4.0 | 6.7 |

## 5. Temperature-sweep rheology

Individual data of temperature-sweep rheology for polyesters are provided in Figure S3.

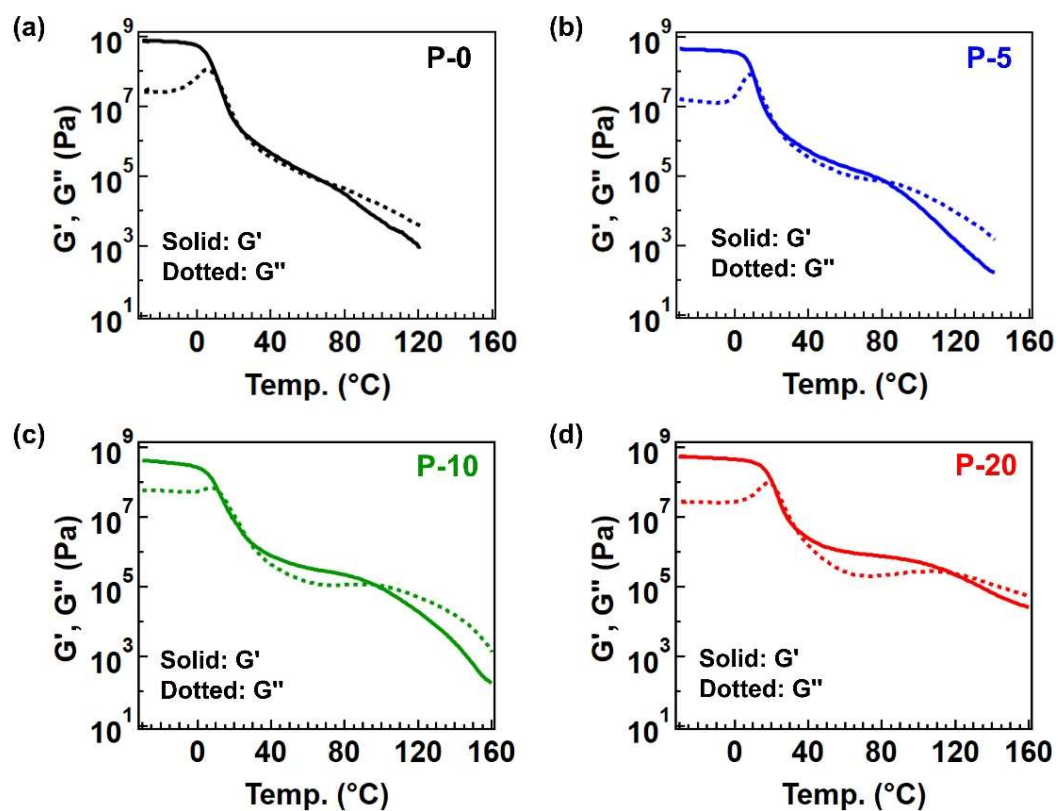

Figure S3. Temperature-sweep rheology data for the polyesters with different fractions of 4-epoxy, i.e., (a) P-0, (b) P-5, (c) P-10, (d) P-20.

Table S6. Summary of flow temperature

|                                      | P-0 | P-5 | P-10 | P-20 |
|--------------------------------------|-----|-----|------|------|
| $T_{\text{flow}} (^{\circ}\text{C})$ | 68  | 82  | 97   | 119  |

## 6. Rheology data for P-30

Figure S4 provides a temperature-ramp rheology data for P-30. Unlike other samples with lower fractions of 4-epoxy, P-30 did not exhibit distinct flow region with loss modulus  $G'' >$  storage modulus  $G'$ . Instead,  $G'$  and  $G''$  were always close at high temperature region, which is a characteristic of the polymer near the percolation threshold. Figure S5 represents frequency sweep for P-30 obtained at 80 °C and 90 °C. It has been known that the sample should represent  $G' \sim G'' \sim \omega^n$  at the percolation threshold.<sup>S1,S2</sup> Thus, these data indicate that P-30 was very close to the percolated network.

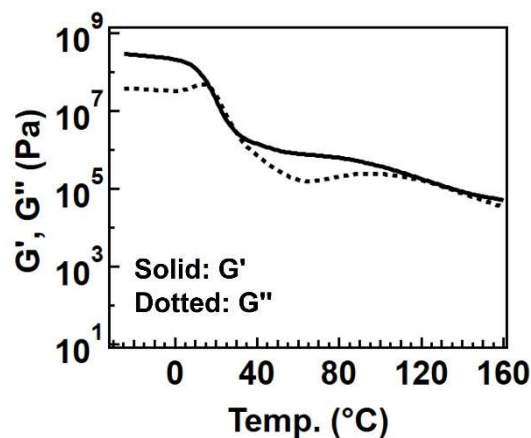

Figure S4. Temperature-sweep rheology data for P-30.

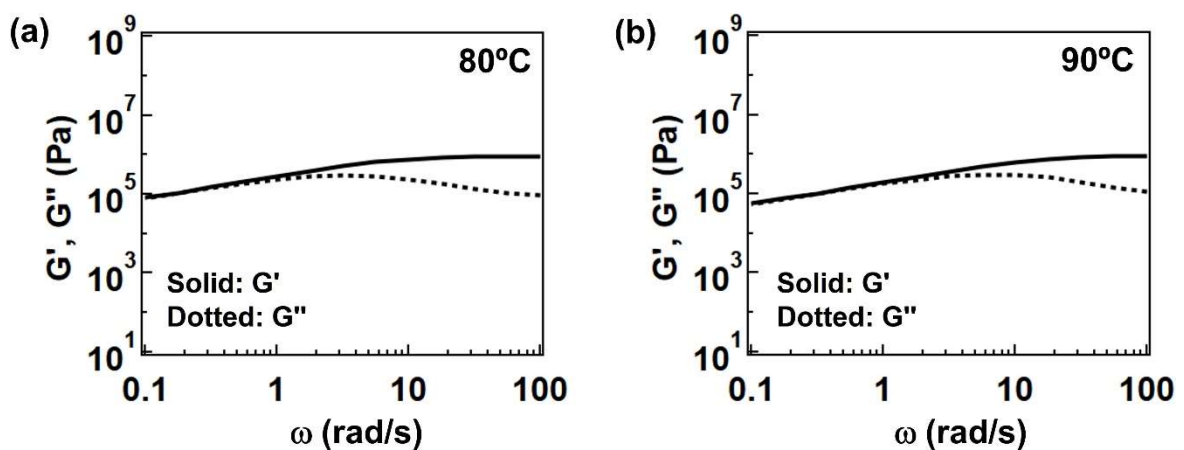

Figure S5. Frequency-sweep rheology data for P-30 at (a) 80 °C and (b) 90 °C.

S1) H. H. Winter, F. Chambon, *J. Rheol.*, 1986, **30**, 367-382.

S2) H. H. Winter, M. Mours, *Adv. Polym. Sci.*, 1997, **134**, 167.

## 7. $^1\text{H-NMR}$ of starting monomers

$^1\text{H-NMR}$  was measured for the starting monomers, 2-epoxy, 4-epoxy, and 2-SH, to investigate the presence of impurities. The measurement was performed in dimethyl sulfoxide- $d_6$  with a Bruker Analytik DPX400 spectrometer (400 MHz). Each signal with a different alphabet corresponds to the protons with the same alphabet in the chemical structures shown in the figure.

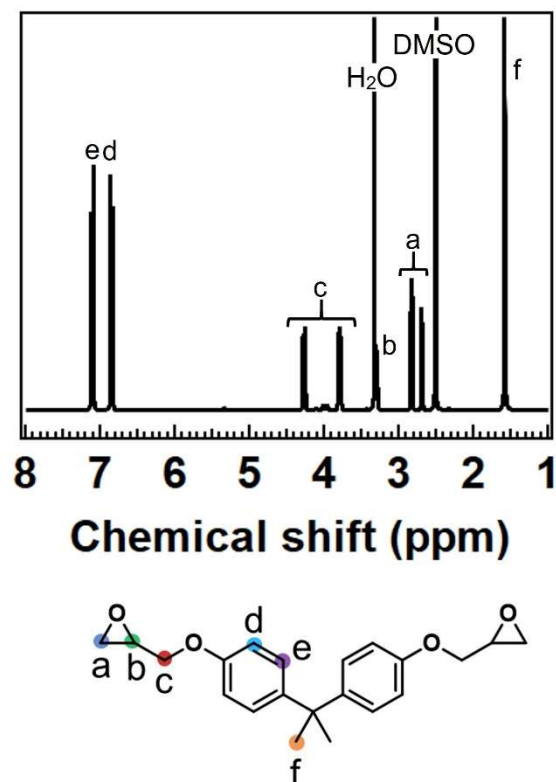

Figure S6.  $^1\text{H-NMR}$  spectrum for 2-epoxy. The signals in the spectra correspond to the protons with the same alphabet in the chemical structures.

Table S7. Integral ratio of characteristic signals of 2-epoxy

| Signal         | a   | b   | c   | d   | e   | f   |
|----------------|-----|-----|-----|-----|-----|-----|
| Integral ratio | 3.9 | 1.9 | 3.9 | 4.3 | 4.3 | 6.4 |



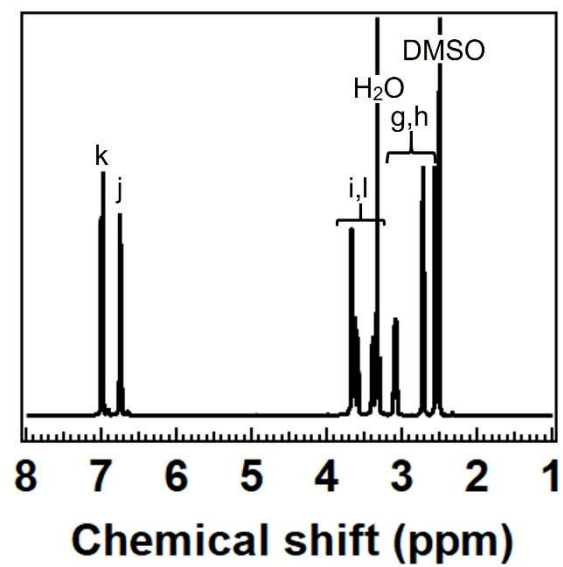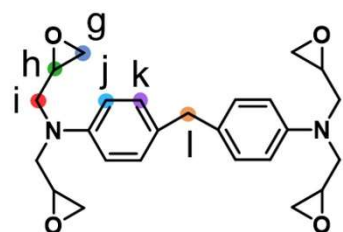

Figure S7.  $^1\text{H}$ -NMR spectrum for 4-epoxy. The signals in the spectra correspond to the protons with the same alphabet in the chemical structures.

Table S8. Integral ratio of characteristic signals of 4-epoxy

| Signal         | g+h  | i+l | j   | k   |
|----------------|------|-----|-----|-----|
| Integral ratio | 11.9 | 9.9 | 4.0 | 4.0 |

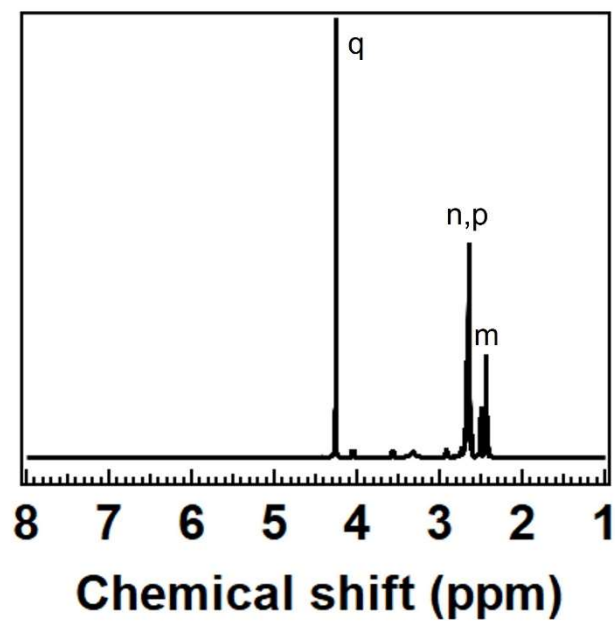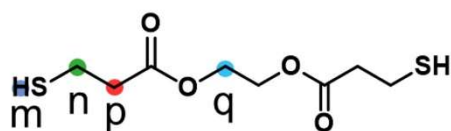

Figure S8.  $^1\text{H}$ -NMR spectrum for 2-SH. The signals in the spectra correspond to the protons with the same alphabet in the chemical structures.

Table S9. Integral ratio of characteristic signals of 2-SH

| Signal         | m   | n+p | q   |
|----------------|-----|-----|-----|
| Integral ratio | 1.7 | 8.2 | 4.0 |

## 8. Isothermal time-resolved rheology data at other temperatures

Figure S9 represents the isothermal time-resolved rheology data at 150 °C and 130 °C. Figure S10 then summarizes the variation of  $t_{gel}$  as function of  $X$  in P- $X$  (i.e., the fraction of 4-epoxy) obtained from results at different temperatures.

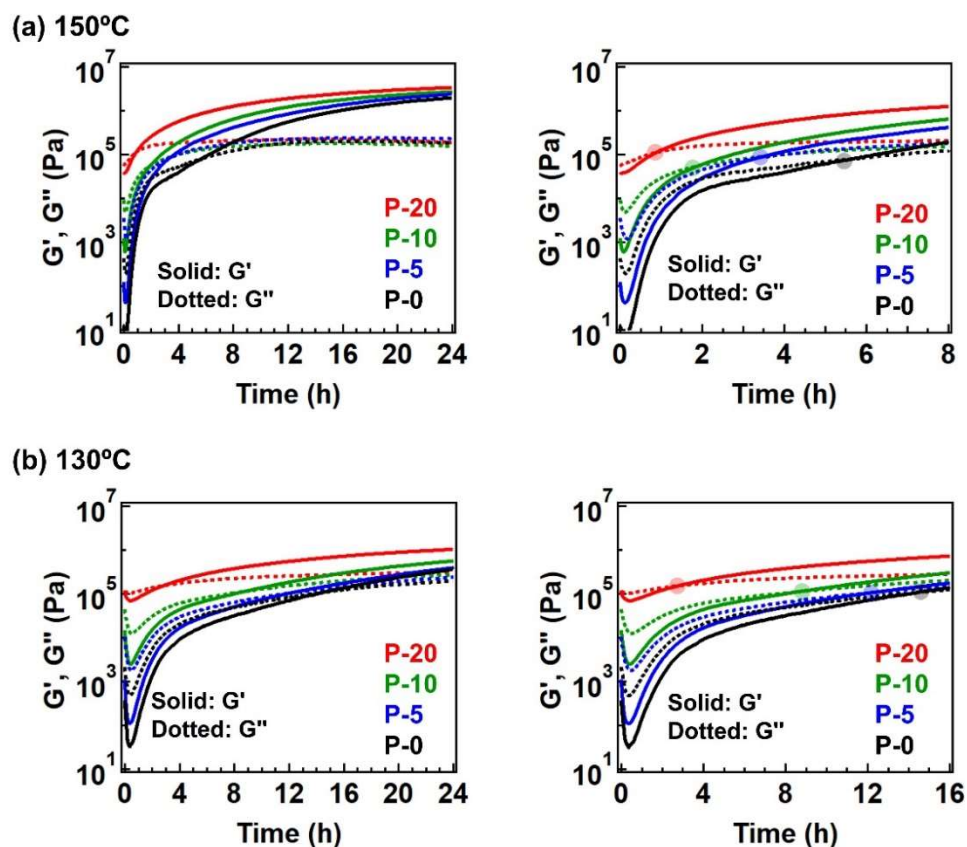

Figure S9. Isothermal time-resolved rheology data measured at (a) 150 °C and (b) 130 °C for 24 h. In the right side, the expanded data are provided for clearer comparison of the cross-point of  $G'$  and  $G''$ . The translucent circle represents the cross-point of  $G'$  and  $G''$ .

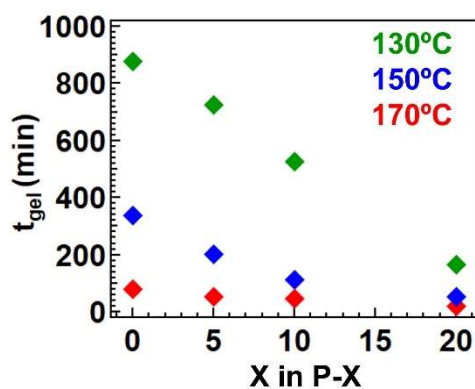

Figure S10. Variation of  $t_{gel}$  as function of  $X$  in P- $X$  (i.e., the fraction of 4-epoxy) obtained from results at different temperatures.

Table S10. Summary of  $t_{\text{gel}}$  in heating at 130 °C

|                        | P-0 | P-5 | P-10 | P-20 |
|------------------------|-----|-----|------|------|
| $t_{\text{gel}}$ (min) | 876 | 725 | 526  | 167  |

Table S11. Summary of  $t_{\text{gel}}$  in heating at 150 °C

|                        | P-0 | P-5 | P-10 | P-20 |
|------------------------|-----|-----|------|------|
| $t_{\text{gel}}$ (min) | 337 | 202 | 114  | 53   |

Table S12. Summary of  $t_{\text{gel}}$  in heating at 170 °C

|                        | P-0 | P-5 | P-10 | P-20 |
|------------------------|-----|-----|------|------|
| $t_{\text{gel}}$ (min) | 79  | 53  | 45   | 20   |

## 9. Plot of $T_g$

Figure S11 summarized the change of  $T_g$  as a function of heating time ( $t_{\text{heat}}$ ) at 170 °C. The DSC thermograms of 2nd heating are provided in Figure S12. The  $T_g$  values are summarized in Table S13.

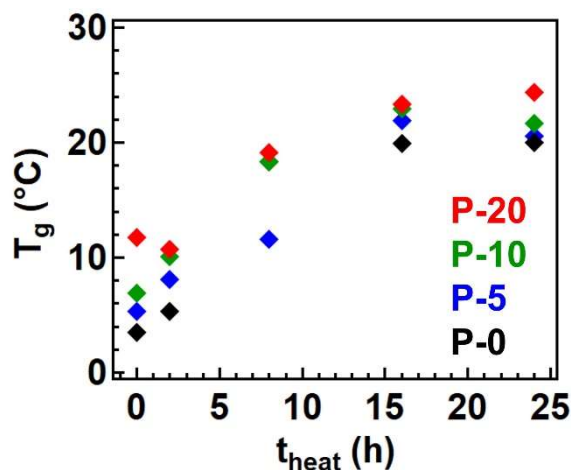

Figure S11. Variation of glass transition temperature ( $T_g$ ) as a function of heating time ( $t_{\text{heat}}$ ) at 170 °C.

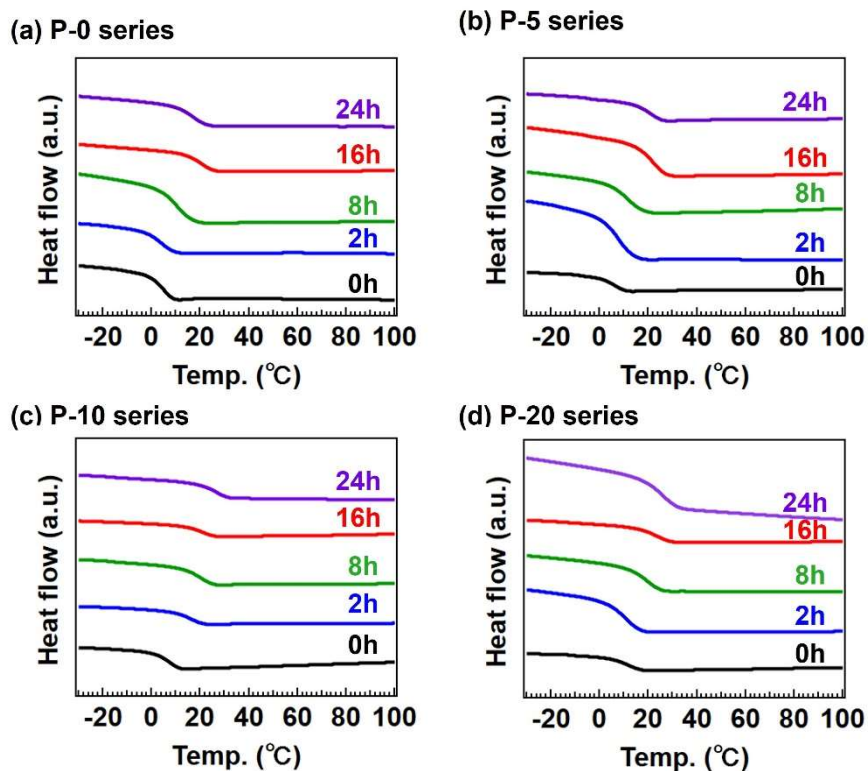

Figure S12. Summary of 2nd heating DSC thermograms for (a) P-0, (b) P-5, (c) P-10, and (d) P-20 series with various  $t_{\text{heat}}$ .

Table S13. Summary of  $T_g$  for the sample after heating at 170 °C for various  $t_{\text{heat}}$

| $t_{\text{heat}}$ (h) | $T_g$ (°C) |            |             |             |
|-----------------------|------------|------------|-------------|-------------|
|                       | P-0 series | P-5 series | P-10 series | P-20 series |
| 0                     | 3.5        | 5.3        | 6.9         | 11.7        |
| 2                     | 5.3        | 8.1        | 10.1        | 10.7        |
| 8                     | 11.2       | 11.6       | 18.4        | 19.1        |
| 16                    | 19.9       | 21.9       | 22.9        | 23.3        |
| 24                    | 20.0       | 20.6       | 21.7        | 24.4        |

## 10. TGA thermograms

Figure S13 represents TGA thermograms for the cross-linked samples, where the cross-linking was performed by heating at 170 °C for 24 h.

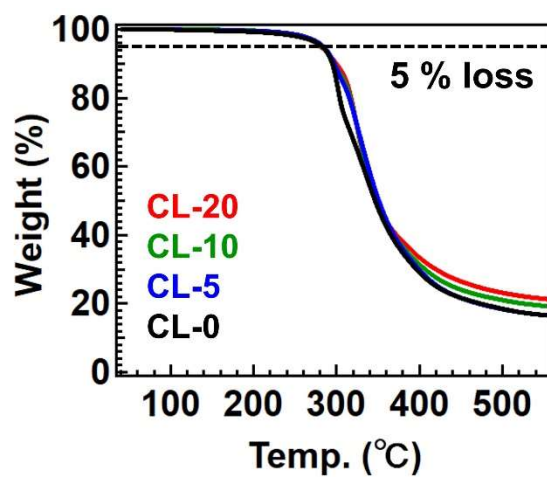

Figure S13. TGA thermograms measured for the sample cross-linked at 170 °C for 24h.
